# Supplementary material for: Observed trends in ground-level O 3 in Monterrey, Mexico, during 1993–2014: comparison with Mexico City and Guadalajara
Source: Copernicus journal article supplement (doi:10.5194/acp-17-9163-2017), 2017-07-31
Supplement: Supplementary file 1 [file acp-17-9163-2017-supplement.zip]

## **S1. Methodology**

### **S1.1 Comparison of long-term trends in O<sub>3</sub> annual averages with 3-yr averaged data**

Linear trends were tested both for O<sub>3</sub> annual averages and 3-yr average O<sub>3</sub> data with the non-parametric Theil-Sen approach. Although, slightly larger O<sub>3</sub> growth rates are determined for the smoothed data than for the annual averages as shown in Fig. S2, non-significant differences ( $p>0.05$ ) were observed between both Sen slopes. Considering this, and that the smoothing of O<sub>3</sub> annual averages could lead to miss significant features in the current trends (Carslaw et al., 2007; Carslaw, 2015), in the current study, O<sub>3</sub> annual averages with no smoothing were used to determine the long-term trends reported at the 3 metropolitan areas.

### **S1.2 Monitoring of O<sub>3</sub> in the Mexico City Metropolitan Area (MCMA)**

The MCMA is located in Central Mexico (19°30'N, 99°02'W) and covers an area of around 9,500 km<sup>2</sup> (Fig. 1). It lies at an average altitude of 2,500 m asl and is surrounded completely by mountains. The MCMA has a population of 20.1 million inhabitants, which makes it the most populous city in Mexico and third in the world (INEGI, 2010). The climate is mild with an annual average temperature of 12-16°C and annual average rainfall of 820 mm. For decades, air pollution emissions in the MCMA, primarily from the industrial, transport and services sectors, resulted in air quality that was and is considered to be very poor by comparison with other large cities in Mexico and with other megacities worldwide (INE, 2011).

Within the MCMA, air quality monitoring is carried out by the Atmospheric Monitoring System of Mexico City (SIMAT), which measures 7 criteria air pollutants (O<sub>3</sub>, SO<sub>2</sub>, NO, NO<sub>2</sub>, CO, PM<sub>10</sub> and PM<sub>2.5</sub>), and 5 meteorological parameters (WS, WD, Temp, RH and UV-SR). SIMAT currently operates a network of 34 stations to monitor air quality, and 15 stations to record meteorological parameters (SEDEMA, 2016a). Data are stored on a central server as hourly averages pending validation by SIMAT. The validated SIMAT data archive comprises hourly measurements of the above 7 criteria air pollutants and 5 meteorological parameters from January 1986 to December 2014. It is managed by the Government of Mexico City, and data were downloaded from their web site (<http://www.aire.df.gob.mx/default.php>).

### **S1.3 Monitoring of O<sub>3</sub> in the Guadalajara Metropolitan Area (GMA)**

The GMA is located NW of Mexico City (20°39'N, 103°21'W; Fig. 2a), covers an area of 3,450 km<sup>2</sup>, and with a population of 4.5 million inhabitants, is the second most populous urban area in Mexico (INEGI, 2010). It is located at an average altitude of 1,550 m asl. The climate is mild with dry springs and wet summers. The annual average temperature is 20.9°C and annual average rainfall is 1,030 mm. The GMA experiences occasional pollution events due to local emissions from automobiles, industry, and commercial and services activities (INE, 2011; SEMADET, 2014). Air quality is monitored within the GMA by the Atmospheric Monitoring System of the Jalisco State (SIMAJ). SIMAJ currently operates 10 stations, which report hourly data for 6 criteria pollutants (CO, NO, NO<sub>2</sub>, O<sub>3</sub>, PM<sub>10</sub>, and SO<sub>2</sub>) and four meteorological parameters (WS, WD, Temp and RH) (SEMADET, 2016). The SIMAJ data archive

contains hourly data recorded from January 1996 to December 2014. It is managed by the Environment and Territorial Development Secretariat of the Jalisco State government, with data downloaded from their web site (<http://siga.jalisco.gob.mx/aire/Datos.html>).

#### **S1.4 comparison of estimated trends from *openair* and MAKESENS 1.0 macro**

To rule methodology influences on the reported trends, Sen slopes for O<sub>3</sub> de-seasonalised annual averages obtained with the MAKESENS 1.0 macro were compared with those obtained with the Theil-Sen function included in the *openair* package for R software (Salmi et al., 2002; Carslaw, 2015). No significant differences ( $p < 0.05$ ) were found between the slopes determined from both approaches as shown in Fig. S4. Hence, all trends reported here were obtained with *openair*.

#### **REFERENCES:**

Carslaw, D. C., and Carslaw, N.: Detecting and characterising small changes in urban nitrogen dioxide concentrations, *Atmos. Environ.*, 41, 4723-4733, doi:10.1016/j.atmosenv.2007.03.034, 2007.

Carslaw, D. C.: The *openair* manual - open-source tools for analysing air pollution data, Manual for version 1.1-4, King's College London, 2015.

INE (Instituto Nacional de Ecología): Cuarto almanaque de datos y tendencias de la calidad del aire en 20 ciudades mexicanas 2000-2009, INE-SEMARNAT, México, D.F., 405 pp., 2011.

INEGI (National Institute of Statistics and Geography): XIII Censo General de Población y Vivienda 2010, México, available at: <http://www.censo2010.org.mx/>, last Access: 22 May 2016, 2010.

SEDEMA (Secretaria del Medio Ambiente de la Ciudad de Mexico): Sistema de Monitoreo Atmosférico, available at: <http://www.aire.df.gob.mx/default.php>, last access: 21 May 2016, 2016a.

SEMADET, (Secretaria de Medio Ambiente y Desarrollo Territorial): Inventario de Emisiones de Contaminantes Criterio del Estado de Jalisco 2008, SEMARNAT, Gobierno del Estado de Jalisco, available at: [http://semadet.jalisco.gob.mx/sites/semadet.jalisco.gob.mx/files/inventario\\_de\\_emisiones\\_cc\\_jalisco\\_2008.pdf](http://semadet.jalisco.gob.mx/sites/semadet.jalisco.gob.mx/files/inventario_de_emisiones_cc_jalisco_2008.pdf), last Access: 23 May 2016, 2014.

SEMADET, (Secretaria de Medio Ambiente y Desarrollo Territorial): Sistema de Monitoreo Atmosférico de Jalisco, available at: <http://siga.jalisco.gob.mx/aire/> last access: 21 May 2016.

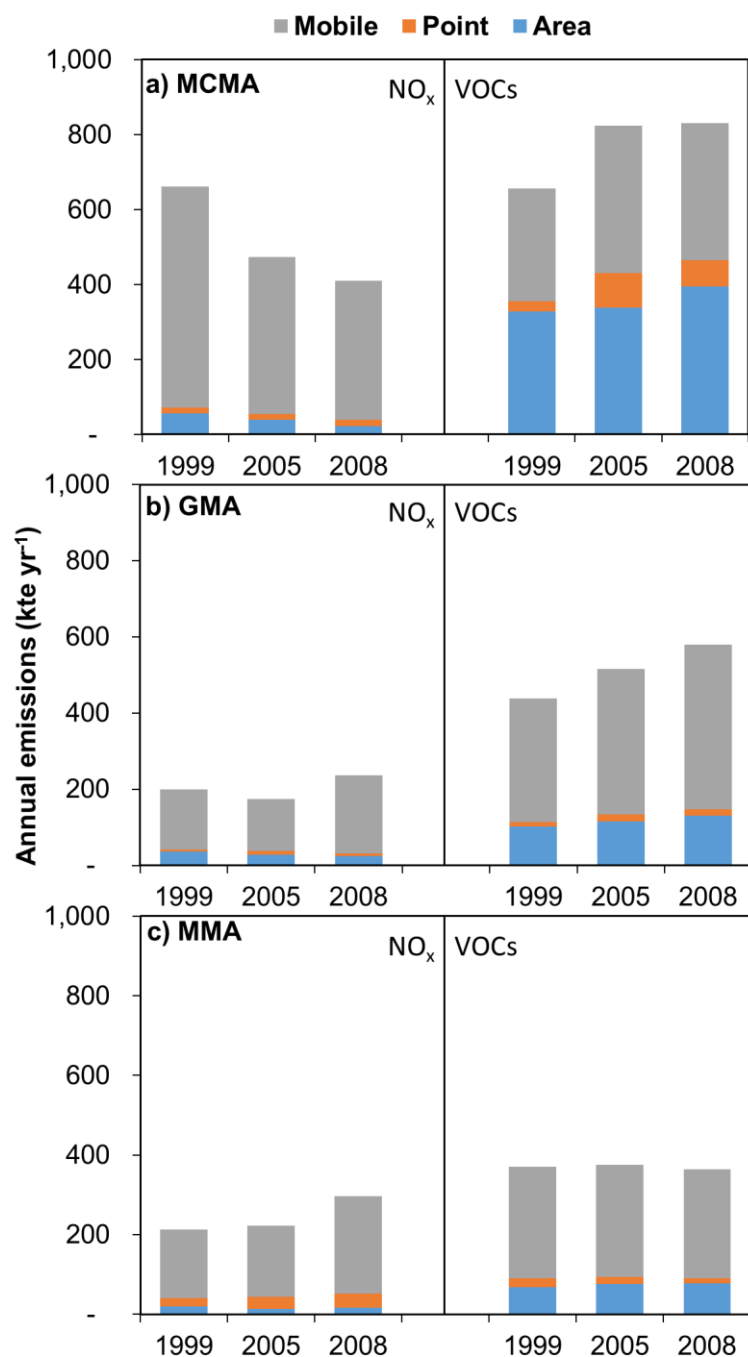

**Fig. S1.**  $\text{NO}_x$  and VOCs anthropogenic emission estimates reported in the NEI for the 1999-, 2005- and 2008-base years for the MCMA, GMA and MMA. Adapted from: SEMARNAT, 2006, 2014, 2015.

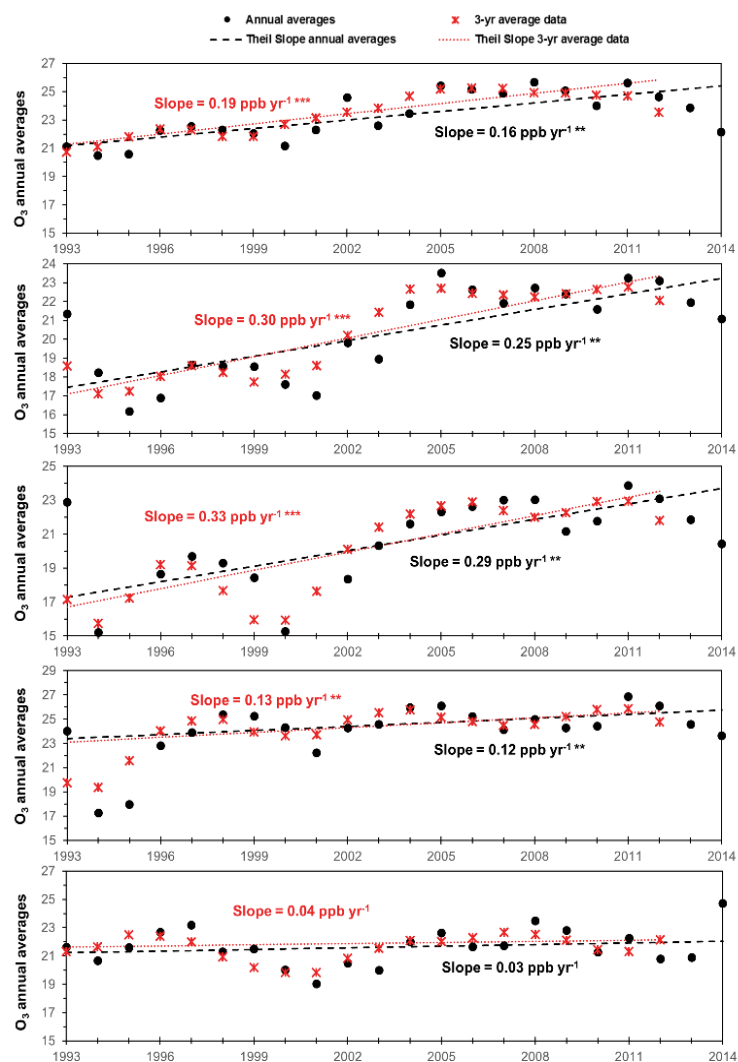

**Fig. S2.** Comparison of long-term trends in for  $O_3$  annual averages (1993-2014), and 3-yr average  $O_3$  data (1993-2012). The dashed lines represent the Theil slopes. Statistical significance is expressed as  $p < 0.1 = +$ ,  $p < 0.05 = *$ ,  $p < 0.01 = **$  and  $p < 0.001 = ***$ .

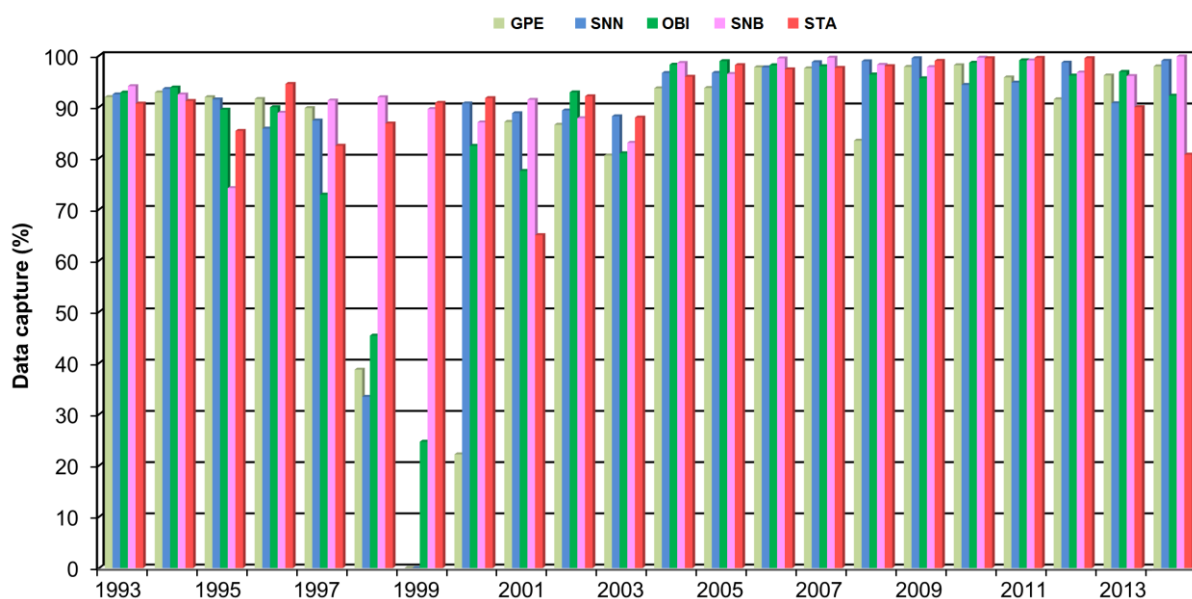

**Fig. S3.** Data capture of 1-h averages recorded for  $O_3$  at the 5 monitoring sites within the MMA during 1993-2014.

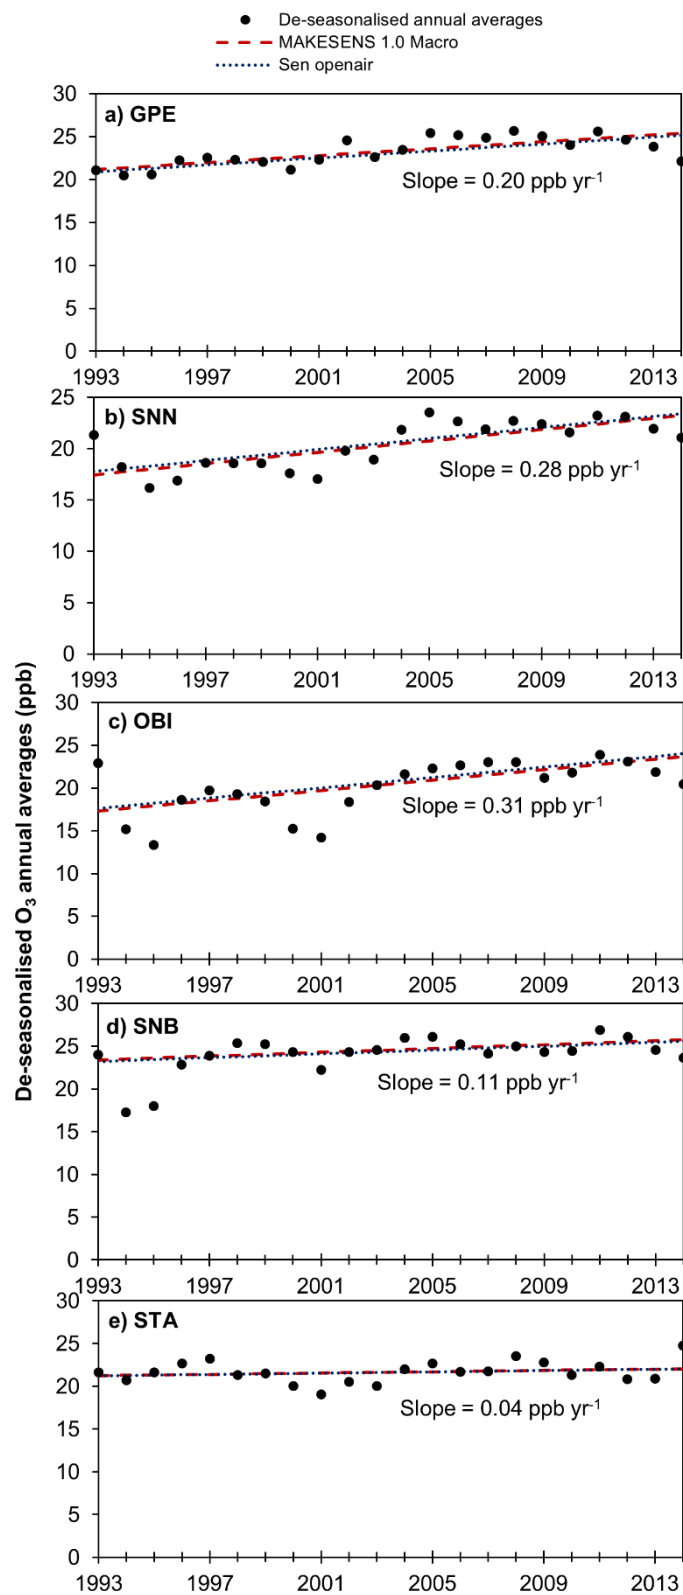

**Fig. S4.** Comparison of Sen slopes determined with the Theil-Sen function included in the *openair* package for R(Carslaw, 2015), and those obtained with the MAKESENS 1.0 macro (Salmi et al., 2002).

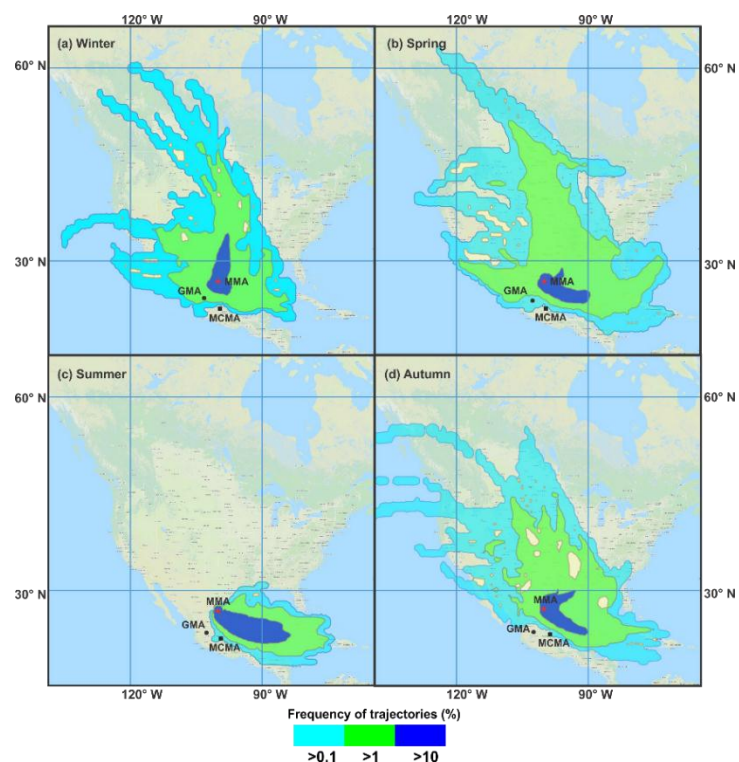

**Fig. S5.** HYSPLIT frequency plots of 96-h back trajectories from the MMA by season during 2014. Each panel represents 3-months of data, with a new trajectory represented every 6 hours.

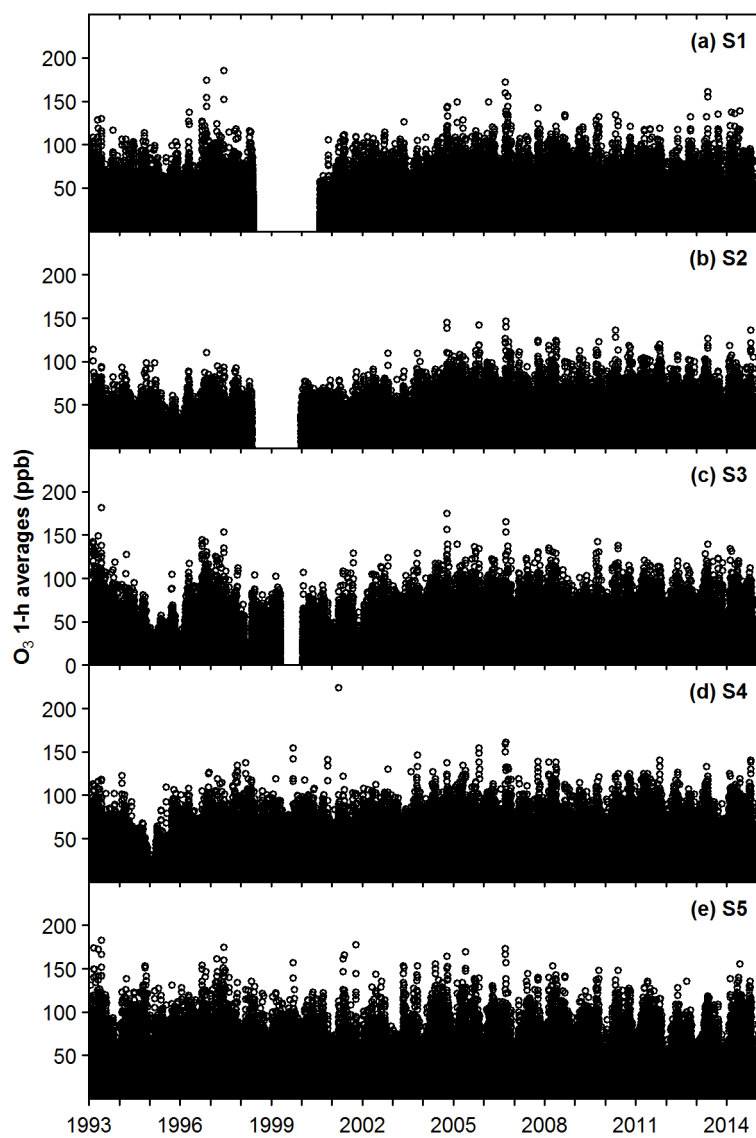

**Fig. S6.** 1-h averages of O<sub>3</sub> calculated at the 5 sites within the MMA during 1993-2014.

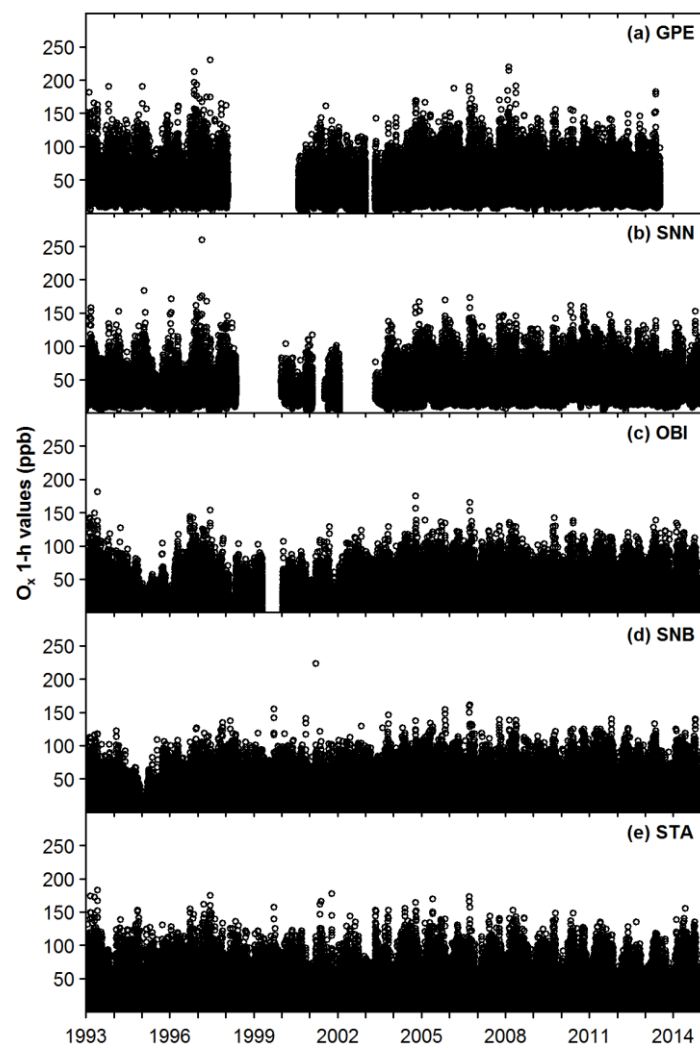

**Fig. S7.** 1-h values of O<sub>3</sub> calculated at the 5 sites within the MMA during 1993-2014.



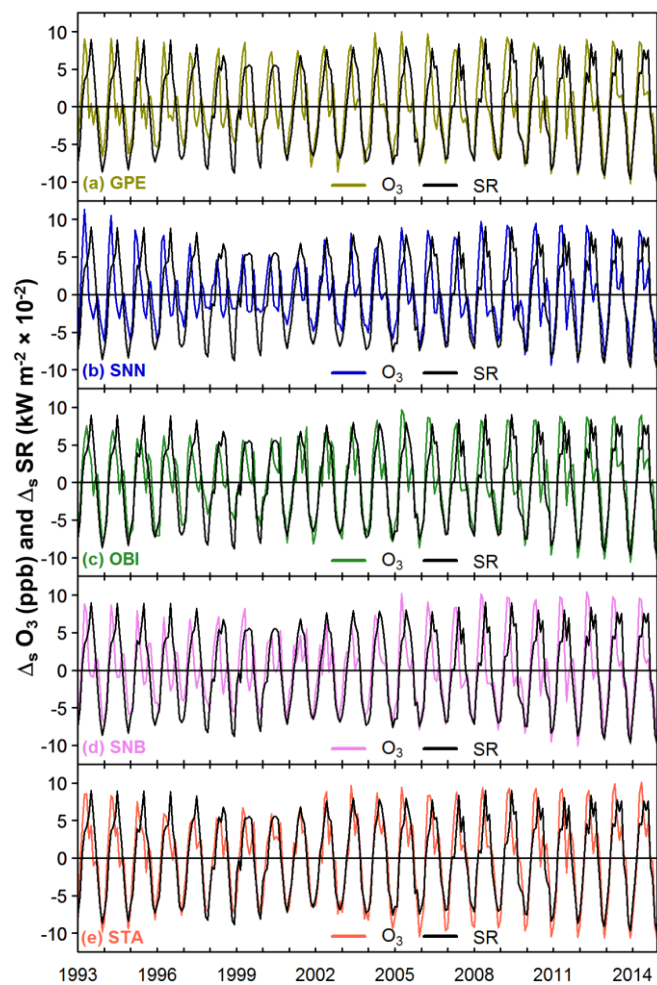

**Fig. S8.** Seasonal variations in  $\text{O}_3$  mixing ratios and SR at the 5 sites within the MMA, constructed from filtered data using the STL technique developed by Cleveland et al. (1990).

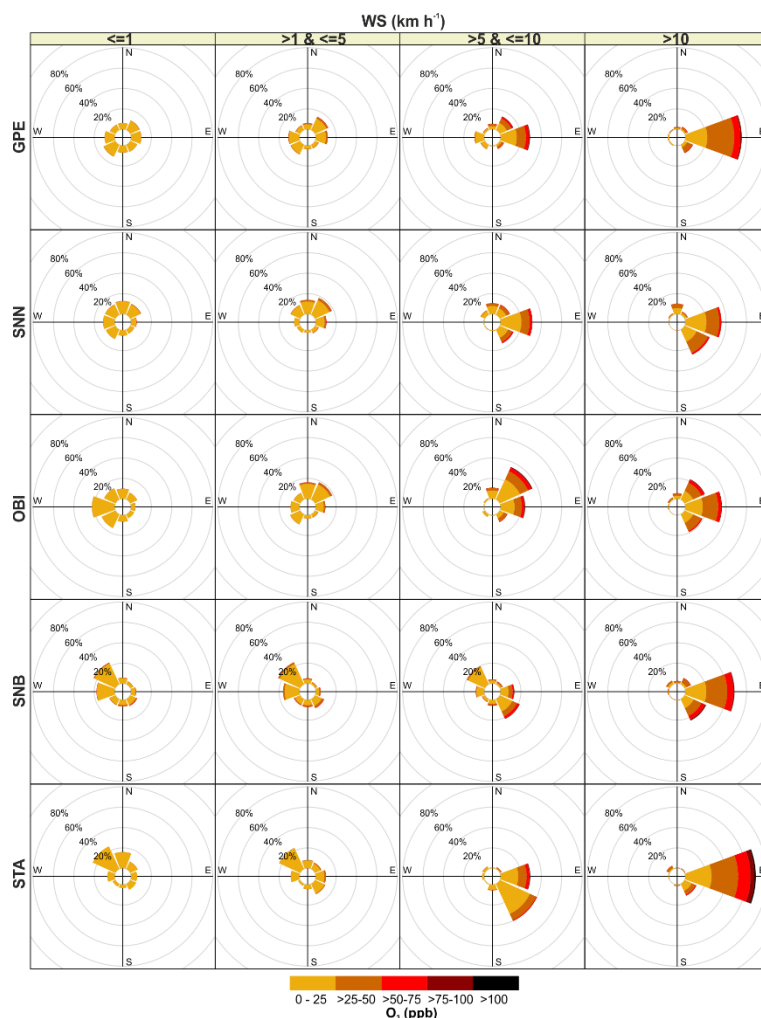

**Fig. S9.** Pollution roses for  $O_3$  1-h averages by wind speeds recorded at the 5 monitoring sites within the MMA during 1993 to 2014.

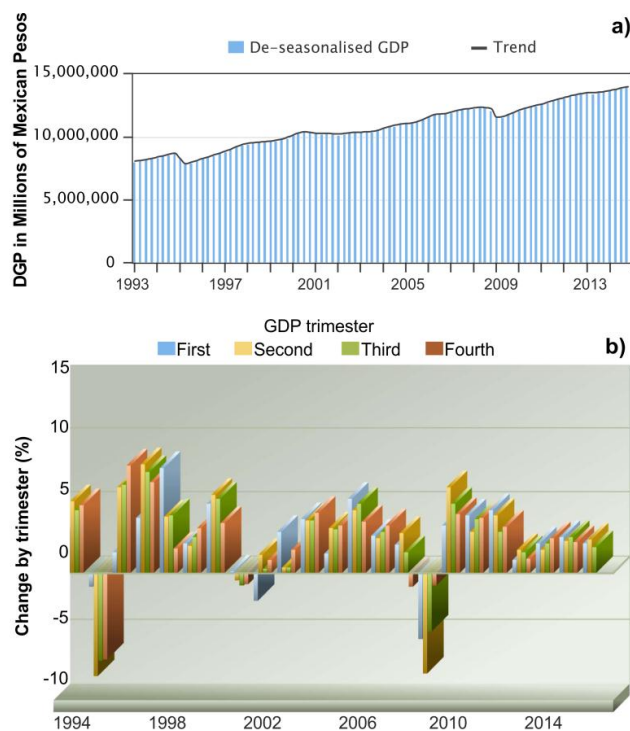

**Fig. S10. a).** Domestic gross product (DGP) by trimester and its trend during 1993-2014 in Mexico. **b).** Change in percentage in the DGP. The dip observed in 1995 is due to the economic crisis experienced in Mexico between 1994-1996, the one observed in 2001-2002 is due to the economic recession in the

Mexican economy during the period, and the one observed in 2009 derives from the global recession period experienced between 2008-2009.

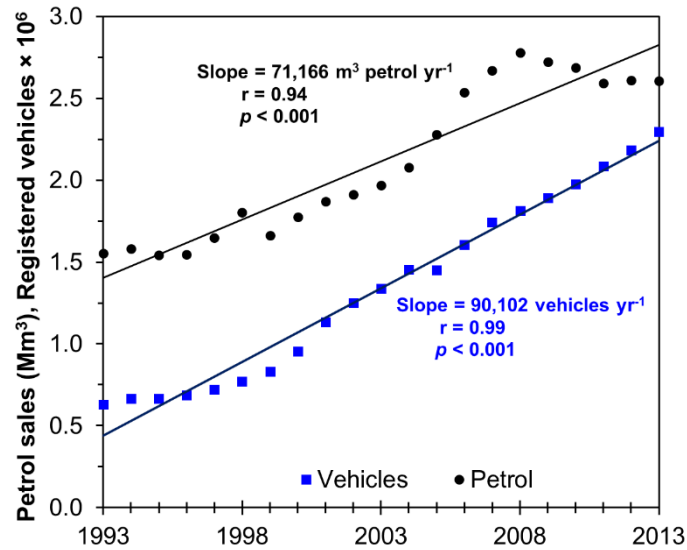

**Fig. S11.** Petrol sales in the MMA and registered vehicles in the Nuevo Leon state during 1993-2013.

**Table S1.** Statistics of O<sub>3</sub> hourly averages in units of ppb at the 5 monitoring sites in the MMA during 1993-2014.

| Year | GPE |     |    |        |       | SNN |     |    |        |       | OBI |     |    |        |       | SNB |     |    |        |       | STA |     |    |        |       |
|------|-----|-----|----|--------|-------|-----|-----|----|--------|-------|-----|-----|----|--------|-------|-----|-----|----|--------|-------|-----|-----|----|--------|-------|
|      | Min | AVG | SD | Median | Max   | Min | AVG | SD | Median | Max   | Min | AVG | SD | Median | Max   | Min | AVG | SD | Median | Max   | Min | AVG | SD | Median | Max   |
| 1993 | 0   | 23  | 17 | 20     | 130   | 2   | 31  | 16 | 28     | 113.5 | 0   | 31  | 21 | 26     | 181.5 | 0   | 32  | 19 | 27     | 118   | 0   | 30  | 23 | 23     | 182.5 |
| 1994 | 0   | 21  | 16 | 19     | 113.5 | 0   | 19  | 12 | 17     | 98.5  | 0   | 15  | 15 | 11     | 127   | 0   | 18  | 14 | 15     | 122.5 | 0   | 21  | 22 | 15     | 153   |
| 1995 | 0   | 24  | 16 | 22     | 103   | 0   | 19  | 12 | 17     | 98    | 0   | 14  | 11 | 13     | 104.5 | 0   | 20  | 15 | 17     | 109   | 0   | 24  | 21 | 19     | 130.5 |
| 1996 | 0   | 23  | 17 | 21     | 174   | 0   | 18  | 13 | 15     | 110   | 0   | 20  | 19 | 15     | 144   | 0   | 24  | 18 | 21     | 126.5 | 0   | 23  | 22 | 17     | 154   |
| 1997 | 0   | 22  | 18 | 19     | 185.5 | 0   | 18  | 14 | 16     | 94.5  | 0   | 19  | 18 | 15     | 153.5 | 0   | 23  | 18 | 20     | 134.5 | 0   | 23  | 24 | 17     | 174.5 |
| 1998 | 0   | 27  | 18 | 27     | 115.5 | 0   | 20  | 13 | 19     | 76.5  | 0   | 18  | 16 | 14     | 103.5 | 0   | 26  | 20 | 23     | 137   | 0   | 21  | 20 | 16     | 135.5 |
| 1999 | NR  | NR  | NR | NR     | NR    | 0   | 25  | 22 | 20     | 52    | 0   | 21  | 17 | 17     | 102.5 | 0   | 25  | 19 | 21     | 154.5 | 0   | 22  | 21 | 17     | 157   |
| 2000 | 0   | 15  | 13 | 13     | 105.5 | 0   | 18  | 13 | 15     | 78    | 0   | 16  | 14 | 12     | 107   | 0   | 25  | 19 | 20     | 141   | 0   | 20  | 21 | 13     | 122.5 |
| 2001 | 0   | 22  | 17 | 19     | 111   | 0   | 16  | 12 | 15     | 88    | 0   | 14  | 14 | 10     | 129   | 0   | 21  | 17 | 17     | 223.5 | 0   | 19  | 20 | 12     | 177.5 |
| 2002 | 0   | 26  | 19 | 22     | 114   | 0   | 21  | 15 | 19     | 109   | 0   | 21  | 18 | 16     | 123.5 | 0   | 25  | 19 | 22     | 129.5 | 0   | 21  | 21 | 15     | 143.5 |
| 2003 | 1   | 22  | 18 | 17     | 126   | 1   | 18  | 14 | 15     | 109   | 1   | 20  | 18 | 14     | 129   | 1   | 25  | 19 | 20     | 146   | 1   | 20  | 21 | 14     | 153   |
| 2004 | 0   | 25  | 19 | 22     | 144   | 0   | 23  | 17 | 19     | 145   | 0   | 23  | 21 | 17     | 175   | 0   | 28  | 21 | 24     | 137   | 0   | 23  | 24 | 16     | 164   |
| 2005 | 0   | 27  | 21 | 24     | 149   | 0   | 25  | 19 | 21     | 142   | 0   | 23  | 21 | 17     | 139   | 0   | 28  | 22 | 23     | 154   | 0   | 24  | 23 | 17     | 169   |
| 2006 | 0   | 27  | 21 | 24     | 172   | 0   | 25  | 19 | 21     | 146   | 0   | 25  | 21 | 19     | 165   | 0   | 28  | 22 | 23     | 161   | 0   | 23  | 22 | 16     | 173   |
| 2007 | 1   | 27  | 19 | 23     | 142   | 0   | 23  | 17 | 19     | 124   | 0   | 23  | 20 | 17     | 130   | 1   | 25  | 20 | 20     | 139   | 1   | 22  | 21 | 15     | 144   |
| 2008 | 0   | 28  | 21 | 23     | 134   | 1   | 25  | 18 | 20     | 124   | 0   | 24  | 21 | 19     | 135   | 1   | 27  | 21 | 22     | 138   | 0   | 25  | 22 | 18     | 153   |
| 2009 | 0   | 28  | 20 | 25     | 132   | 0   | 25  | 17 | 21     | 123   | 0   | 22  | 18 | 18     | 142   | 1   | 26  | 20 | 22     | 121   | 0   | 25  | 21 | 19     | 148   |
| 2010 | 1   | 26  | 19 | 23     | 134   | 1   | 23  | 17 | 19     | 136   | 1   | 22  | 19 | 18     | 138   | 1   | 26  | 20 | 21     | 125   | 1   | 24  | 21 | 18     | 148   |
| 2011 | 0   | 29  | 20 | 25     | 119   | 0   | 26  | 18 | 22     | 120   | 0   | 26  | 21 | 21     | 121   | 1   | 30  | 22 | 25     | 140   | 1   | 26  | 23 | 20     | 135   |
| 2012 | 0   | 26  | 18 | 23     | 132   | 1   | 25  | 16 | 22     | 107   | 0   | 23  | 19 | 20     | 120   | 0   | 27  | 20 | 24     | 126   | 0   | 23  | 19 | 19     | 135   |
| 2013 | 1   | 26  | 19 | 23     | 161   | 2   | 24  | 17 | 21     | 126   | 1   | 23  | 19 | 19     | 139   | 1   | 26  | 19 | 22     | 133   | 1   | 23  | 19 | 18     | 118   |
| 2014 | 1   | 24  | 19 | 20     | 139   | 2   | 23  | 17 | 19     | 136   | 1   | 21  | 19 | 17     | 134   | 2   | 26  | 21 | 21     | 140   | 1   | 27  | 23 | 21     | 155   |

NR: No records

AVG: Annual average.

SD: Standard deviation of the average.

**Table S2.** Statistics of O<sub>x</sub> hourly data in units of ppb at the 5 monitoring sites within the MMA during 1993-2014.

| Year | GPE |     |    |        |     | SNN |     |    |        |     | OBI |     |    |        |     | SNB |     |    |        |     | STA |     |    |        |     |
|------|-----|-----|----|--------|-----|-----|-----|----|--------|-----|-----|-----|----|--------|-----|-----|-----|----|--------|-----|-----|-----|----|--------|-----|
|      | Min | AVG | SD | Median | Max | Min | AVG | SD | Median | Max | Min | AVG | SD | Median | Max | Min | AVG | SD | Median | Max | Min | AVG | SD | Median | Max |
| 1993 | 5   | 37  | 21 | 33     | 190 | 4   | 35  | 17 | 32     | 158 | 6   | 51  | 27 | 45     | 330 | 7   | 42  | 21 | 37     | 250 | 10  | 46  | 28 | 39     | 286 |
| 1994 | 3   | 35  | 17 | 31     | 148 | 6   | 32  | 14 | 30     | 153 | 2   | 41  | 21 | 36     | 233 | 7   | 32  | 16 | 30     | 191 | 8   | 46  | 27 | 39     | 251 |
| 1995 | 2   | 35  | 17 | 32     | 190 | 3   | 30  | 15 | 28     | 184 | 4   | 39  | 18 | 35     | 160 | 4   | 32  | 18 | 29     | 193 | 11  | 44  | 23 | 39     | 211 |
| 1996 | 2   | 36  | 20 | 33     | 213 | 3   | 32  | 16 | 30     | 171 | 6   | 46  | 25 | 41     | 220 | 7   | 37  | 20 | 34     | 219 | 10  | 45  | 26 | 38     | 196 |
| 1997 | 5   | 36  | 19 | 32     | 230 | 5   | 33  | 17 | 31     | 260 | 5   | 44  | 25 | 39     | 200 | 6   | 37  | 19 | 33     | 204 | 6   | 46  | 27 | 38     | 213 |
| 1998 | 8   | 40  | 19 | 36     | 162 | 6   | 38  | 14 | 36     | 146 | 2   | 40  | 23 | 37     | 216 | 2   | 40  | 22 | 37     | 209 | 2   | 37  | 23 | 33     | 181 |
| 1999 | NR  | NR  | NR | NR     | NR  | NR  | NR  | NR | NR     | NR  | 7   | 41  | 18 | 38     | 142 | 2   | 30  | 19 | 26     | 171 | 5   | 39  | 24 | 34     | 208 |
| 2000 | 2   | 34  | 18 | 32     | 102 | 2   | 27  | 14 | 25     | 110 | 2   | 46  | 31 | 40     | 290 | 2   | 31  | 20 | 26     | 163 | 2   | 39  | 26 | 32     | 179 |
| 2001 | 2   | 34  | 18 | 31     | 161 | 4   | 31  | 14 | 29     | 117 | 2   | 51  | 27 | 46     | 251 | 2   | 26  | 17 | 21     | 228 | 2   | 34  | 25 | 27     | 207 |
| 2002 | 2   | 37  | 20 | 34     | 130 | 2   | 23  | 17 | 21     | 99  | 6   | 48  | 23 | 43     | 233 | 2   | 29  | 21 | 23     | 133 | 2   | 32  | 21 | 26     | 146 |
| 2003 | 2   | 29  | 18 | 25     | 143 | 5   | 30  | 17 | 27     | 138 | 2   | 30  | 21 | 25     | 160 | 3   | 29  | 14 | 26     | 108 | 2   | 31  | 21 | 26     | 139 |
| 2004 | 4   | 37  | 20 | 33     | 169 | 6   | 33  | 17 | 30     | 167 | 3   | 37  | 22 | 33     | 225 | 3   | 39  | 19 | 35     | 158 | 2   | 38  | 25 | 31     | 182 |
| 2005 | 8   | 42  | 20 | 39     | 166 | 8   | 40  | 19 | 38     | 170 | 8   | 42  | 22 | 38     | 179 | 10  | 41  | 21 | 37     | 196 | 5   | 46  | 26 | 40     | 192 |
| 2006 | 7   | 41  | 20 | 37     | 190 | 9   | 39  | 18 | 36     | 173 | 11  | 47  | 22 | 42     | 185 | 8   | 42  | 21 | 38     | 183 | 2   | 51  | 26 | 46     | 239 |
| 2007 | 7   | 38  | 19 | 35     | 170 | 8   | 39  | 17 | 36     | 146 | 13  | 45  | 22 | 41     | 189 | 9   | 40  | 19 | 37     | 162 | 2   | 47  | 26 | 42     | 185 |
| 2008 | 7   | 41  | 21 | 38     | 220 | 6   | 40  | 18 | 37     | 145 | 9   | 45  | 22 | 41     | 171 | 10  | 44  | 21 | 40     | 172 | 2   | 42  | 25 | 36     | 188 |
| 2009 | 4   | 40  | 18 | 37     | 155 | 7   | 37  | 16 | 34     | 142 | 10  | 41  | 18 | 38     | 168 | 10  | 43  | 19 | 40     | 166 | 5   | 43  | 22 | 37     | 176 |
| 2010 | 7   | 39  | 19 | 35     | 155 | 8   | 46  | 18 | 43     | 162 | 10  | 43  | 22 | 39     | 168 | 6   | 43  | 19 | 40     | 145 | 2   | 34  | 23 | 30     | 181 |
| 2011 | 7   | 41  | 19 | 38     | 142 | 3   | 41  | 19 | 38     | 147 | 3   | 40  | 23 | 36     | 147 | 2   | 43  | 22 | 39     | 165 | 2   | 45  | 26 | 39     | 172 |
| 2012 | 8   | 37  | 17 | 34     | 149 | 2   | 37  | 16 | 34     | 136 | 13  | 42  | 19 | 38     | 153 | 12  | 43  | 19 | 40     | 163 | 6   | 46  | 22 | 41     | 219 |
| 2013 | 8   | 39  | 18 | 36     | 182 | 7   | 34  | 16 | 31     | 138 | 3   | 40  | 20 | 35     | 162 | 6   | 42  | 20 | 39     | 158 | 3   | 43  | 21 | 40     | 222 |
| 2014 | NR  | NR  | NR | NR     | NR  | 8   | 37  | 17 | 33     | 153 | 6   | 36  | 21 | 30     | 175 | 3   | 34  | 22 | 30     | 164 | 3   | 37  | 22 | 31     | 173 |

NR: No records.

AVG: Annual average.

SD: Standard deviation of the averages.
