# Supplementary material for: Observed trends in ground-level O 3 in Monterrey, Mexico, during 1993–2014: comparison with Mexico City and Guadalajara
Source: Copernicus journal article supplement (doi:10.5194/acp-17-9163-2017), 2017-07-31
Supplement: Supplementary file 2 [file acp-17-9163-2017-supplement.zip]

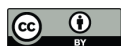

## *Supplement of*

# **Observed trends in ground-level O<sub>3</sub> in Monterrey, Mexico, during 1993–2014: comparison with Mexico City and Guadalajara**

Iván Y. Hernández Paniagua et al.

*Correspondence to:* A. Mendoza ([mendoza.alberto@itesm.mx](mailto:mendoza.alberto@itesm.mx))

- [acp-17-9163-2017-supplement-title-page.pdf](#)
- [acp-2016-654-supplement](#)
  - [MMA data set 1993-2014.zip](#)
  - [Metropolitan areas data set 1993-2014.zip](#)
  - [Supplementary material.pdf](#)

The copyright of individual parts of the supplement might differ from the CC BY 3.0 License.
